# Supplementary material for: Bacterial Community in the Gut of Neanthes japonica and Its Association with Surrounding Environment
Source: MDPI journal article supplement (doi:10.3390/d14070514), 2022-06-25
Supplement: s1 [file s1]

Table S1. Alpha diversity indices

|        | observed_otus | shannon | simpson | chao1   | goods_coverage |
|--------|---------------|---------|---------|---------|----------------|
| Gut_1  | 77            | 0.64    | 0.13    | 77.00   | 1.00           |
| Gut_2  | 123           | 0.58    | 0.10    | 126.93  | 1.00           |
| Gut_3  | 115           | 0.73    | 0.14    | 115.00  | 1.00           |
| Gut_4  | 286           | 4.96    | 0.81    | 286.00  | 1.00           |
| Soil_1 | 2755          | 10.35   | 1.00    | 2755.00 | 1.00           |
| Soil_2 | 3275          | 10.44   | 1.00    | 3316.44 | 0.99           |
| Soil_3 | 3720          | 10.72   | 1.00    | 3775.67 | 0.99           |
| Soil_4 | 3560          | 10.59   | 1.00    | 3589.58 | 1.00           |

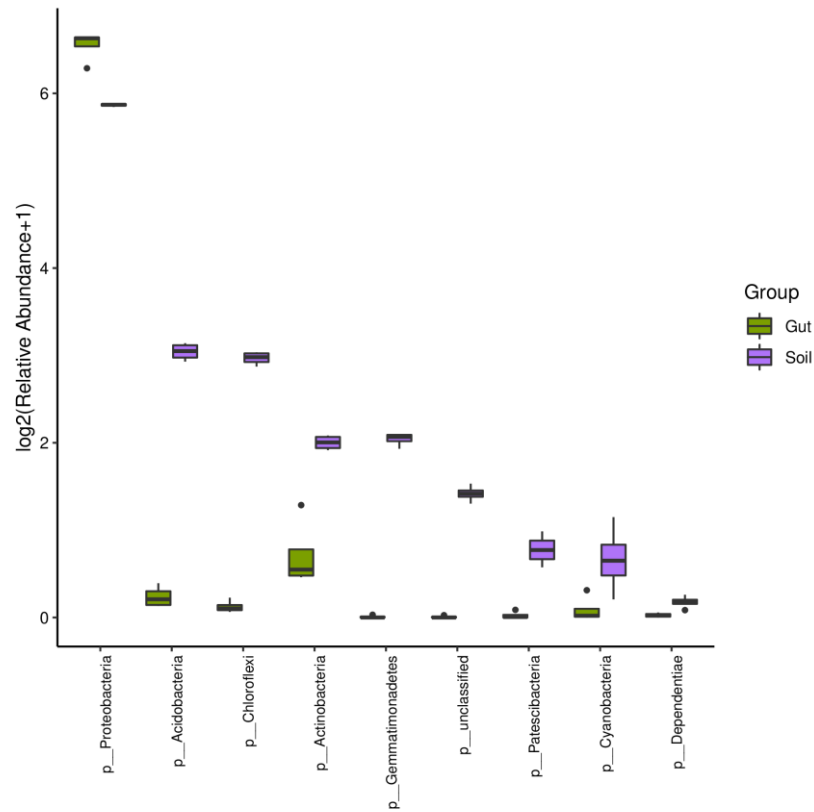

**Figure S1.** The boxplot of bacterial taxa with significant difference at the phylum level

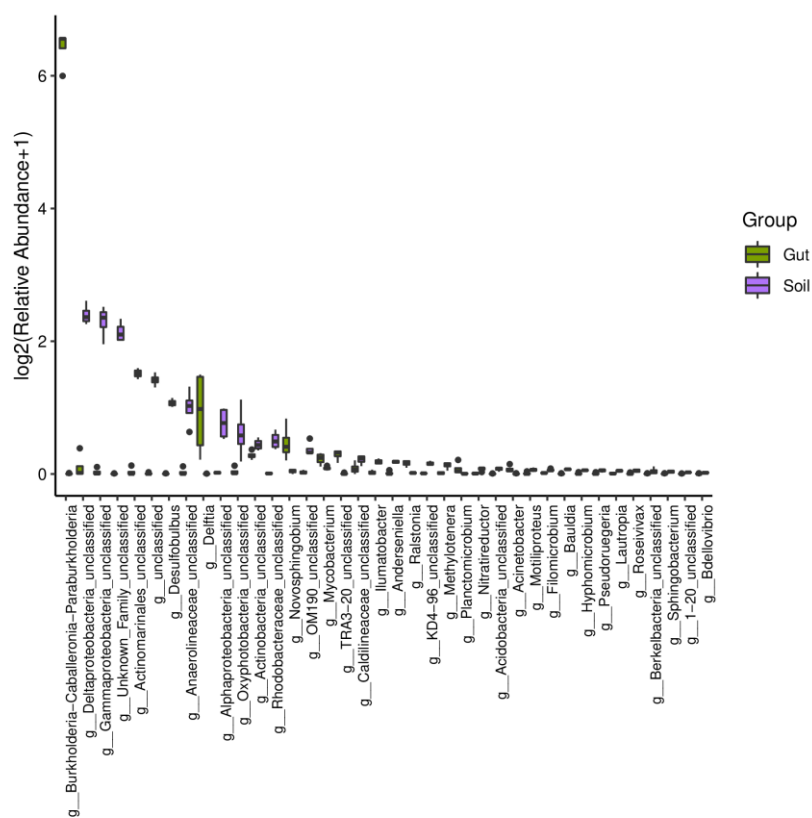

**Figure S2.** The boxplot of bacterial taxa with significant difference at the genus level
